# Supplementary material
Source: HighWire-hosted journal article supplement (https://openheart.bmj.com/content/12/1/e003088)
Supplement: inline-supplementary-material-2 [file inline-supplementary-material-2.pdf]

Disposition of participants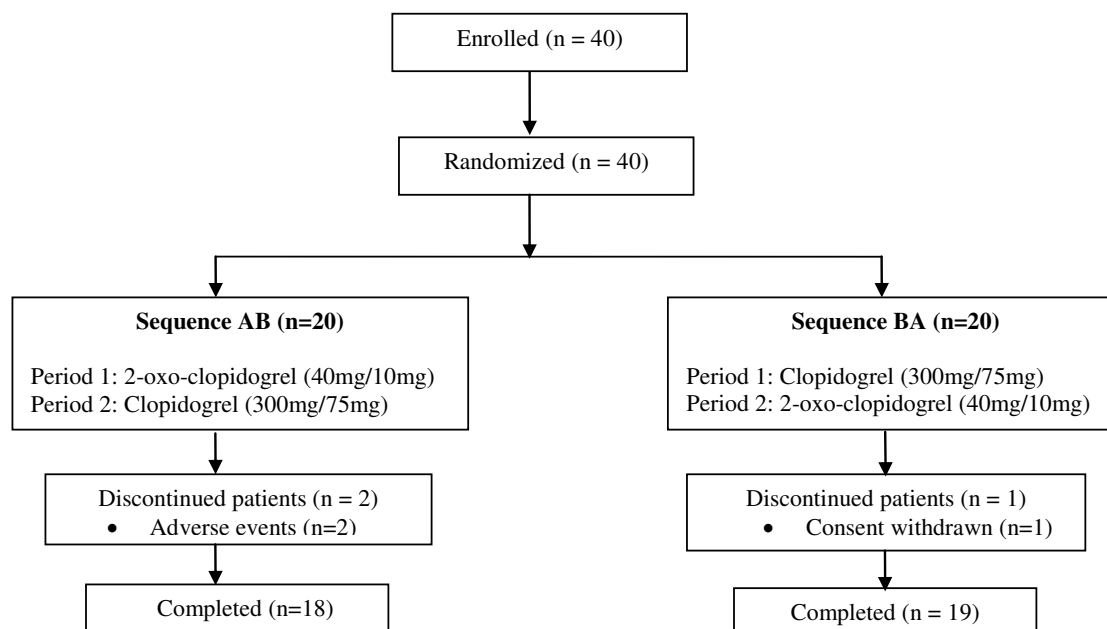

*Note: A washout period of at least 14 days was maintained between the study periods*
